# Supplementary material for: The Human Meconium Metabolome and Its Evolution during the First Days of Life
Source: Metabolites. 2022 May 5;12(5):414. doi: 10.3390/metabo12050414 (PMC9147484; doi:10.3390/metabo12050414)
Supplement: Supplementary file 1 [file metabolites-12-00414-s001.zip › Table S1.xlsx]

## Sheet: Supplementary Table S1
Table S1. Description of meconium samples collected in the present study
Newborn (NB)	Sexe (Male/Female)	Sampling time Minutes (hours)	Code
NB1	F	390 (6H30)	NB1.390
		915 (15H15)	NB1.915
		3060 (51H)	NB1.3060
NB2	M	570 (9H30)	NB2.570
		1005 (16H45)	NB2.1005
		2640 (44H)	NB2.2640
NB3	M	420 (7H)	NB3.420
		1440 (24H)	NB3.1440
		4740 (79H)	NB3.4740
NB4	M	1170 (19H30)	NB4.1170
		1620 (27H)	NB4.1620
NB5	M	420 (7H)	NB5.420
		930 (15H30)	NB5.930
NB6	M	960 (16H)	NB6.960
		2520 (42H)	NB6.2520
NB7	M	1140 (19H)	NB7.1140
		1350 (22H30)	NB7.1350
		2580 (43H)	NB7.2580
NB8	M	270 (4H30)	NB8.270
		1020 (17H)	NB8.1020
		1200 (20H)	NB8.1200
		2640 (44H)	NB8.2640
		2880 (48H)	NB8.2880
NB9	F	195 (3H15)	NB9.195
		1215 (20H15)	NB9.1215
		1305 (21H45)	NB9.1305
		1920 (32H)	NB9.1920
		2700 (45H)	NB9.2700
		2820 (47H)	NB9.2820
NB10	M	90 (1H30)	NB10.90
		1020 (17H)	NB10.1020
		1065 (17H45)	NB10.1065
NB11	M	795 (13H15)	NB11.795

## Sheet: Supplementary Table S2
Table S2. List of metabolites annotated in meconium samples (metabolites in bold are those showing metabolic changes over time)
Feature_name	Metabolite	Composition	M	Chemical Class	[M-H]-	[M+H]+	RT ZIC-pHILIC (min)	RT C18 (min)	Metabolite identification criteria	Metabolite identification level (according to Metabolomics Standards Initiative)	Wilcoxon_sig_gp1_to_gp2	PLSDA_VIP	HMDB_id	kegg_id
M240T503	L-Cystine	C6H12N2O4S2	240.024	Amino Acids, Peptides, and Analogues	239.017	241.03	8.33	0.76	a,b,c,d,e	1	decrease	1.19184	HMDB00192	C00491
M181T419_3	D-Mannitol	C6H14O6	182.079	Carbohydrates and Carbohydrate Conjugates	181.072	nd	7	nd	a,b,d	1	decrease	1.04206	HMDB00765	C00392
M266T389	Adenosine	C10H13N5O4	267.097	Nucleosides, Nucleotides, and Analogues	266.091	268.103	5.2	1.17	a,b,c,d,e	1	decrease	1.10669	HMDB00050	C00212
M193T520_3	D-Galacturonic acid	C6H10O7	194.043	Carbohydrates and Carbohydrate Conjugates	193.035	217.031	8.75	0.77	a,b,c,d	1	decrease	1.6292	HMDB02545	C08348
M171T459	Glycerol-phosphate	C3H9O6P	172.014	Carbohydrates and Carbohydrate Conjugates	171.007	nd	7.63	nd	a,b,d	2	decrease	1.74181	HMDB00126	C00093
M215T520_2	Xanthopterin	C6H5N5O2	179.044	Nucleosides, Nucleotides, and Analogues	178.036	nd	8.74	nd	a,b,d	1	decrease	1.73131	NA	NA
M193T520_4	D-Glucuronic acid	C6H10O7	194.043	Carbohydrates and Carbohydrate Conjugates	193.035	nd	8.75	nd	a,b,d	1	decrease	1.6292	HMDB0000127	C00191
M229T519	D-Ribose-phosphate	C5H11O8P	230.019	Carbohydrates and Carbohydrate Conjugates	229.012	nd	8.58	nd	a,b,d	2	decrease	1.60165	HMDB01548	C00117
M177T419_2	2-Isopropylmalic acid	C7H12O5	176.069	Organic Acids and Derivatives	175.061	199.06	7.49	4.43	a,b,c,d	1	decrease	1.57442	HMDB00402	C02504
M149T523	L-(+)-Tartaric acid	C4H6O6	150.016	Organic Acids and Derivatives	149.009	nd	9.24	nd	a,b,d	1	decrease	1.54331	HMDB00956	C00898
M175T520	D-(+)-Glucuronic acid gamma-lactone	C6H8O6	176.032	Carbohydrates and Carbohydrate Conjugates	131.035	nd	8.75	nd	a,b,d	1	decrease	1.47275	HMDB06355	C02670
M101T321_2	Succinic semialdehyde	C4H6O3	102.032	Organic Acids and Derivatives	101.025	nd	5.35	nd	a,b,d	1	decrease	1.39998	HMDB01259	C00232
M562T76	Taurolithocholic acid 3-sulfate	C26H45NO8S2	563.259	Bile acids	562.251	nd	1.28	nd	a,b,d	1	decrease	1.28541	HMDB02580	C03642
M87T431	Oxaloacetic acid	C4H4O5	132.006	Organic Acids and Derivatives	87.0085	nd	7.19	nd	a,b	1	decrease	1.19792	HMDB00223	C00036
M209T542	D-Saccharic acid	C6H10O8	210.038	Carbohydrates and Carbohydrate Conjugates	207.051	nd	9.21	nd	a,b,d	1	decrease	1.12608	HMDB00663	C00818
M308T431_3	(-)-N-Acetylneuraminic acid	C11H19NO9	309.106	Carbohydrates and Carbohydrate Conjugates	308.099	310.112	7.3	0.78	a,b,c,d,e	1	decrease	1.05711	HMDB00230	C19910
M139T280	4-Imidazoleacrylic acid (urocanic acid)	C6H6N2O2	138.043	Amino Acids, Peptides, and Analogues	137.036	nd	5.01	nd	a,b,c,d,e	1	decrease	0.55548	HMDB00301	C00785
M124T417	Taurine	C2H7NO3S	125.015	Amino Acids, Peptides, and Analogues	124.007	nd	8.19	nd	a,b,d	1	increase	1.93844	HMDB00251	C00245
M116T292_1	Valine	C5H11NO2	117.079	Amino Acids, Peptides, and Analogues	116.072	nd	4.86	nd	a,b,d	1	increase	1.5826	HMDB00883	C00183
M114T361	Proline	C5H9NO2	115.063	Amino Acids, Peptides, and Analogues	114.056	116.07	6.02	1.04	a,b,c,d,e	1	increase	1.56496	HMDB00162	C00148
M164T167_2	Phenylalanine	C9H11NO2	165.079	Amino Acids, Peptides, and Analogues	164.072	166.086	2.82	1.88	a,b,c,d,e	1	increase	1.32844	HMDB00159	C00079
M161T521	5-Hydroxylysine	C6H14N2O3	162.1	Amino Acids, Peptides, and Analogues	161.093	163.107	8.66	0.68	a,b,c,d,e	1	increase	1.26514	HMDB00450	C16741
M190T130	N-Acetylhistamine	C7H11N3O	153.09	Amino Acids, Peptides, and Analogues	190.055	nd	2.17	nd	a,b,d	1	increase	1.01296	HMDB13253	C05135
M215T448	Glucose-PO4	C6H13O9P	260.03	Carbohydrates and Carbohydrate Conjugates	213.186	nd	6.36	nd	a,b	2	increase	1.70087	HMDB01401	C00092
M149T402	L(+)arabinose	C5H10O5	150.053	Carbohydrates and Carbohydrate Conjugates	149.046	nd	6.81	nd	a,b,d	2	increase	1.3863	HMDB00646	C00259
M367T85	Estriol 17-sulphate	C18H24O6S	368.129	Steroids and steroid derivatives	367.125	nd	1.61	nd	a,b,d	1	increase	1.31486	NA	NA
M134T191	Adenine	C5H5N5	135.054	Nucleosides, Nucleotides, and Analogues	134.047	nd	3.21	nd	a,b,d	1	increase	1.95402	HMDB00034	C00147
M164T205	7-methylguanine	C6H7N5O	165.065	Nucleosides, Nucleotides, and Analogues	164.058	nd	3.44	nd	a,b,d	1	increase	1.56033	HMDB00897	C02242
M125T133	Thymine	C5H6N2O2	126.043	Nucleosides, Nucleotides, and Analogues	125.036	nd	2.21	nd	a,b	1	increase	1.48197	HMDB00262	C00178
M665T570_2	Stachyose	C24H42O21	666.222	Carbohydrates and Carbohydrate Conjugates	665.215	689.208	9.69	0.75	a,b,c,d	2	increase	2.04458	HMDB03553	C01613
M665T570_1	Maltotetraose	C24H42O21	666.222	Carbohydrates and Carbohydrate Conjugates	665.215	nd	9.49	nd	a,b,d	1	increase	2.04458	HMDB01296	C02052
M171T79	Capric acid	C10H20O2	172.146	Fatty acids and conjugates	171.139	nd	1.32	nd	a,b,d	1	increase	2.01192	HMDB00511	C01571
M121T306	D-Threitol	C4H10O4	122.058	Carbohydrates and Carbohydrate Conjugates	157.026	nd	5.23	nd	a,b,d	1	increase	1.98109	HMDB04136	C16884
M181T199	Homovanillic acid	C9H10O4	182.058	Catecholamines and Derivatives	181.051	nd	3.43	nd	a,b,d	1	increase	1.93674	HMDB00118	C05582
M105T357	D-Glyceric acid	C3H6O4	106.027	Carbohydrates and Carbohydrate Conjugates	105.019	nd	6.08	nd	a,b,d	1	increase	1.90509	HMDB00139	C00258
M187T299	N acetyl L glutamine	C7H12N2O4	188.08	Amino Acids, Peptides, and Analogues	187.073	189.086	4.99	1.01	a,b,c,d,e	1	increase	1.90489	HMDB06029	NA
M187T352	Azelaic acid	C9H16O4	188.105	Organic Acids and Derivatives	187.098	nd	6.05	nd	a,b,d	1	increase	1.81926	HMDB00784	C08261
M174T478_2	N-Acetyl-L-aspartic acid	C6H9NO5	175.048	Amino Acids, Peptides, and Analogues	174.041	130.05	8.11	0.76	a,b,c,d	1	increase	1.81178	HMDB00812	C01042
M130T207_1	N-Acetyl-L-alanine	C5H9NO3	131.058	Amino Acids, Peptides, and Analogues	130.051	nd	3.53	nd	a,b,d	1	increase	1.76115	HMDB00766	NA
M131T139	Methyl-succinic acid	C5H8O4	132.042	Organic Acids and Derivatives	131.035	nd	2.34	nd	a,b,d	1	increase	1.73274	HMDB01844	C08645
M117T135	2-Hydroxy 3-methylbutyric acid (α-Hydroxyisovaleric acid)	C5H10O3	118.063	Fatty acids and conjugates	117.056	nd	2.31	nd	a,b,d	1	increase	1.70676	HMDB00407	NA
M155T302	Orotic acid	C5H4N2O4	156.017	Nucleosides, Nucleotides, and Analogues	155.01	nd	5.32	nd	a,b,d	1	increase	1.65181	HMDB00226	C00295
M146T306	O-Acetyl-L-serine	C5H9NO4	147.053	Amino Acids, Peptides, and Analogues	146.046	nd	5.23	nd	a,b,d	1	increase	1.63115	HMDB03011	C00979
M407T88_2	Cholic acid	C24H40O5	408.288	Bile acids	407.281	nd	1.52	nd	a,b,d	1	increase	1.61821	HMDB00619	C00695
M204T157	Indolelactic acid	C11H11NO3	205.074	Indoles and Indole Derivatives	204.03	nd	2.62	nd	a,b,d	1	increase	1.61123	HMDB00671	C02043
M88T413	Sarcosine	C3H7NO2	89.0477	Amino Acids, Peptides, and Analogues	88.0405	nd	6.89	nd	a,b,d	1	increase	1.59868	HMDB00271	C00213
M128T271_3	L-Pyroglutamic-acid	C5H7NO3	129.043	Amino Acids, Peptides, and Analogues	128.036	130.05	4.66	1.01	a,b,c,d,e	1	increase	1.59632	HMDB00267	C01879
M130T477	trans-4-hydroxy-L-proline	C5H9NO3	131.058	Amino Acids, Peptides, and Analogues	130.051	nd	8.1	nd	a,b,d	1	increase	1.58497	HMDB00725	C01157
M300T72	Acetyl-N-formyl-5-methoxykynurenamine/Phenylacetyl-L-glutamine	C13H16N2O4	264.111	Amino Acids, Peptides, and Analogues	263.104	nd	1.82	nd	a,b,d	1	increase	1.56791	HMDB04259	C05642
M103T174	(S)-3-Hydroxybutyric acid	C4H8O3	104.047	Organic Acids and Derivatives	103.04	nd	2.98	nd	a,b,d	1	increase	1.55508	HMDB00442	C03197
M147T150_1	Ethylmethylacetic acid	C5H10O2	102.068	Organic Acids and Derivatives	147.066	nd	2.58	nd	a,b,d	1	increase	1.51407	HMDB02176	C18319
M147T150_2	Mevalonic acid	C6H12O4	148.074	Organic Acids and Derivatives	147.066	nd	2.51	nd	a,b,d	1	increase	1.51407	HMDB00227	C00418
M223T124	Indoleacrylic acid	C11H9NO2	187.063	Indoles and Indole Derivatives	186.056	nd	2.67	nd	a,b,d	1	increase	1.46529	HMDB00734	NA
M173T399	Suberic acid	C8H14O4	174.089	Organic Acids and Derivatives	173.082	nd	6.82	nd	a,b,d	1	increase	1.45946	HMDB00893	C08278
M185T180	L-Alanyl-L-proline	C8H14N2O3	186.1	Amino Acids, Peptides, and Analogues	185.094	187.107	3.06	0.92	a,b,c,d,e	1	increase	1.43621	HMDB0028695	NA
M188T463	N-Acetyl-L-glutamic acid	C7H11NO5	189.064	Amino Acids, Peptides, and Analogues	188.057	190.07	7.87	1.33	a,b,c,d,e	1	increase	1.42553	HMDB01138	C00624
M135T398_2	Threonic acid	C4H8O5	136.037	Carbohydrates and Carbohydrate Conjugates	135.03	nd	6.77	nd	a,b,d	1	increase	1.38643	HMDB0000943	C01620
M116T341	N-Acetylglycine	C4H7NO3	117.043	Amino Acids, Peptides, and Analogues	116.035	nd	5.81	nd	a,b,d	1	increase	1.35916	HMDB00532	NA
M341T483	Sucrose	C12H22O11	342.116	Carbohydrates and Carbohydrate Conjugates	341.109	nd	7.81	nd	a,b,d	1	increase	1.34783	HMDB00258	C00089
M87T149	Isobutyric acid	C4H8O2	88.0524	Organic Acids and Derivatives	87.0452	nd	2.48	nd	a,b	1	increase	1.34026	HMDB01873	C02632
M144T206	4-Acetamidobutanoic acid	C6H11NO3	145.074	Fatty acids and conjugates	144.067	nd	3.39	nd	a,b,d	1	increase	1.33674	HMDB03681	C02946
M227T76	Myristic acid	C14H28O2	228.209	Fatty acids and conjugates	227.202	nd	1.26	nd	a,b	1	increase	1.30161	HMDB00806	C06424
M137T297	4-Hydroxybenzoic acid	C7H6O3	138.032	Aromatic Acids	137.025	nd	4.94	nd	a,b,d	1	increase	1.2842	HMDB00500	C00156
M301T73	cis-5,8,11,14,17-Eicosapentaenoic acid	C20H30O2	302.225	Fatty acids and conjugates	301.217	nd	1.23	nd	a,b,d	1	increase	1.2649	HMDB01999	C06428
M368T85	Curcumin	C21H20O6	368.126	Others	367.122	nd	1.37	nd	a,b,d	1	increase	1.26391	HMDB02269	C10443
M89T234_2	D-Lactic acid	C3H6O3	90.0317	Organic Acids and Derivatives	89.0245	nd	3.9	nd	a,b,d	1	increase	1.23813	HMDB01311	C00256
M117T493_3	Succinic acid	C4H6O4	118.027	Organic Acids and Derivatives	117.019	nd	9.92	nd	a,b,d	1	increase	1.16702	HMDB00254	C00042
M174T457	L-Citrulline	C6H13N3O3	175.096	Amino Acids, Peptides, and Analogues	174.089	176.102	7.64	0.76	a,b,c,d,e	1	stable	1.17559	HMDB00904	C00327
M148T221_1	Methionine	C5H11NO2S	149.051	Amino Acids, Peptides, and Analogues	148.044	nd	3.68	nd	a,b,d	1	stable	1.1641	HMDB00696	C00073
M203T230	DL-Tryptophan	C11H12N2O2	204.09	Amino Acids, Peptides, and Analogues	203.057	nd	3.86	nd	a,b	1	stable	1.12131	HMDB30396	C00806
M131T42_2	Agmatine	C5H14N4	130.122	Amino Acids, Peptides, and Analogues	nd	131.129	nd	0.7	a,c,e	1	stable	1.04437	HMDB01432	C00179
M275T512	L-Saccharopine	C11H20N2O6	276.132	Amino Acids, Peptides, and Analogues	275.125	277.138	8.62	0.77	a,b,c,d,e	1	stable	0.937757	HMDB00279	C00449
M131T528	Ornithine	C5H12N2O2	132.09	Amino Acids, Peptides, and Analogues	131.083	133.097	9.57	0.69	a,b,c,d	1	stable	0.922367	HMDB00214	C00077
M145T553_1	Lysine	C6H14N2O2	146.106	Amino Acids, Peptides, and Analogues	145.098	147.112	9.21	0.69	a,b,c,d,e	1	stable	0.824455	HMDB00182	C00047
M112T197	Creatinine	C4H7N3O	113.059	Amino Acids, Peptides, and Analogues	112.052	nd	3.28	nd	a,b,d	1	stable	0.801604	HMDB00562	C00791
M173T580	Arginine	C6H14N4O2	174.112	Amino Acids, Peptides, and Analogues	173.105	175.118	9.67	0.72	a,b,c,d,e	1	stable	0.692775	HMDB00517	C00062
M154T405	Histidine	C6H9N3O2	155.07	Amino Acids, Peptides, and Analogues	154.062	156.076	7.47	0.71	a,b,c,d,e	1	stable	0.636569	HMDB00177	C00135
M298T257	5-Deoxy-5-(methylthio)adenosine	C11H15N5O3S	297.09	Nucleosides, Nucleotides, and Analogues	nd	298.096	nd	4.27	a,c,e	1	stable	0.48973	HMDB01173	C00170
M173T309	Nα-Acetyl-L-asparagine	C6H10N2O4	174.064	Amino Acids, Peptides, and Analogues	173.057	175.071	8.02	1.02	a,b,c,d,e	1	stable	0.485993	HMDB06028	NA
M86T41	Cadaverin	C5H14N2	102.116	Polyamines	nd	86.0961	nd	0.67	a,c	1	stable	0.477345	HMDB02322	C01672
M148T46_2	N-Acetyl-DL-serine	C5H9NO4	147.053	Amino Acids, Peptides, and Analogues	nd	148.06	nd	0.76	a,c,e	1	stable	0.419778	HMDB03011	C00979
M209T113	L-Kynurenine	C10H12N2O3	208.085	Amino Acids, Peptides, and Analogues	nd	209.091	nd	2.09	a,c,e	1	stable	0.419402	HMDB00684	C00328
M130T446	Creatine	C4H9N3O2	131.07	Amino Acids, Peptides, and Analogues	130.062	nd	7.43	nd	a,b,d	1	stable	0.400083	HMDB00064	C00300
M247T366	N-acetyl-DL-tryptophan	C13H14N2O3	246.1	Amino Acids, Peptides, and Analogues	nd	247.107	nd	6.11	a,c,e	1	stable	0.32669	HMDB13713	NA
M200T556	L-Cysteine S-sulfate	C3H7NO5S2	200.977	Amino Acids, Peptides, and Analogues	197.046	nd	9.49	nd	a,b,d	1	stable	0.324322	HMDB00731	C05824
M185T285	D-(-)-Ribose	C5H10O5	150.053	Carbohydrates and Carbohydrate Conjugates	149.046	173.044	4.52	1.08	a,b,c,d	2	stable	0.271746	HMDB00283	C00121
M104T432	Serine	C3H7NO3	105.043	Amino Acids, Peptides, and Analogues	104.035	106.049	7.25	0.97	a,b,c,d,e	1	stable	0.252161	HMDB00187	C00065
M217T491	N-α-acetyl-L-arginine	C8H16O3N4	216.122	Amino Acids, Peptides, and Analogues	215.033	nd	7.67	nd	a,b,d	1	stable	0.246904	HMDB04620	NA
M90T45_2	Alanine	C3H7NO2	89.0477	Amino Acids, Peptides, and Analogues	nd	90.0547	nd	0.76	a,c,e	1	stable	0.229172	HMDB00161	C00041
M212T150	Indoxyl sulfate	C8H7NO4S	213.009	Indoles and Indole Derivatives	209.03	nd	2.5	nd	a,b,d	1	stable	0.0617293	HMDB00682	NA
M269T48	N-Acetyl-L-carnosine	C11H16N4O4	268.117	Amino Acids, Peptides, and Analogues	nd	269.123	nd	0.8	a,c,e	1	stable	0.0497927	HMDB12881	NA
M145T422	L-Glutamine	C5H10N2O3	146.069	Amino Acids, Peptides, and Analogues	145.062	147.076	7.09	0.76	a,b,c,d,e	1	stable	0.0493991	HMDB00641	C00064
M166T248	Isoleucine	C6H13NO2	131.095	Amino Acids, Peptides, and Analogues	130.088	nd	3.43	nd	a,b,d	1	stable	0.0397707	HMDB00172	C00407
M173T47	D-Xylulose	C5H10O5	150.053	Carbohydrates and Carbohydrate Conjugates	nd	173.041	nd	0.78	a,c	2	stable	0.733842	HMDB01644	C00310
M187T48	L-Fucose	C6H12O5	164.069	Carbohydrates and Carbohydrate Conjugates	nd	187.057	nd	0.8	a,c	2	stable	0.602566	HMDB00174	C01019
M203T547	N-Acetylgalactosamine	C8H15NO6	221.09	Carbohydrates and Carbohydrate Conjugates	199.97	nd	9.39	nd	a,b,d	1	stable	0.310963	HMDB00212	C01074
M151T372	D-(+)-Arabitol	C5H12O5	152.069	Carbohydrates and Carbohydrate Conjugates	151.061	nd	6.18	nd	a,b,d	2	stable	0.119007	HMDB00568	C01904
M137T44	1-Methylnicotinamide	C7H9N2O	136.064	Nucleosides, Nucleotides, and Analogues	nd	137.071	nd	0.74	a,c	1	stable	0.516234	HMDB00699	C02918
M448T84	glycodeoxycholic acid	C26H43NO5	449.314	Bile acids	448.307	nd	1.43	nd	a,b,d	1	stable	1.32768	HMDB00631	C05464
M455T79	Lithocholic acid-sulfate	C24H40O6S	456.255	Bile acids	455.247	nd	1.31	nd	a,b	2	stable	1.26027	HMDB00907	NA
M179T541	Myo-inositol	C6H12O6	180.063	Alcohols and Polyols	179.056	nd	9.01	nd	a,b,d	1	stable	1.1006	HMDB00211	C00137
M395T74	Pregnenolone sulfate	C21H32O5S	396.197	Steroids and steroid derivatives	395.19	nd	1.23	nd	a,b,d	1	stable	0.693079	HMDB00774	NA
M371T77	Androsterone sulphate	C19H30O5S	370.181	Steroids and steroid derivatives	369.174	nd	1.29	nd	a,b,d	1	stable	0.662646	HMDB02759	NA
M331T80	17a-Hydroxypregnenolone	C21H32O3	332.235	Steroids and steroid derivatives	331.228	nd	1.33	nd	a,b,d	1	stable	0.580872	HMDB00363	C05138
M498T80	Taurochenodeoxycholic acid	C26H45NO6S	499.297	Bile acids	498.289	482.291	1.36	8.17	a,b,c,d	1	stable	0.561182	HMDB00951	C05465
M283T73	D-erythro-Dihydrosphingosine (Sphinganine)	C18H39NO2	301.298	Fatty acids and conjugates	283.264	nd	1.22	nd	a,b	1	stable	0.183466	HMDB0000269	NA
M218T81	Propionylcarnitine	C10H19NO4	217.131	Fatty acid esters	nd	218.138	nd	1.34	a,c,e	1	stable	0.0189619	HMDB00824	C03017
M204T54	Acetyl-L-carnitin	C9H17NO4	203.116	Fatty acid esters	nd	204.122	nd	0.9	a,c,e	1	stable	0.00515127	HMDB00201	C02571
M157T437	Allantoin	C4H6N4O3	158.044	Nucleosides, Nucleotides, and Analogues	157.037	nd	7.41	nd	a,b,d	1	stable	0.940745	HMDB00462	C01551
M151T340	Xanthine	C5H4N4O2	152.033	Nucleosides, Nucleotides, and Analogues	151.026	153.04	5.81	0.97	a,b,c,d,e	1	stable	0.887691	HMDB00292	C00385
M279T233	Uridine	C9H12N2O6	244.07	Nucleosides, Nucleotides, and Analogues	243.063	nd	3.93	nd	a,b,d	1	stable	0.870249	HMDB00296	C00299
M281T160	2-O-Methylinosine	C11H14N4O5	282.096	Nucleosides, Nucleotides, and Analogues	281.09	283.103	2.65	1.53	a,b,c,d,e	1	stable	0.79422	HMDB03950	NA
M111T162	Uracil	C4H4N2O2	112.027	Nucleosides, Nucleotides, and Analogues	111.02	nd	2.67	nd	a,b	1	stable	0.773772	HMDB00300	C00106
M226T228	Deoxycytidine	C9H13N3O4	227.091	Nucleosides, Nucleotides, and Analogues	226.084	nd	3.85	nd	a,b,d	1	stable	0.697116	HMDB00014	C00881
M243T349	beta-Pseudouridine	C9H12N2O6	244.07	Nucleosides, Nucleotides, and Analogues	243.063	245.076	5.9	0.97	a,b,c,d,e	1	stable	0.689656	HMDB00767	C02067
M287T432	Orotidine	C10H12N2O8	288.059	Nucleosides, Nucleotides, and Analogues	287.053	nd	7.43	nd	a,b,d	1	stable	0.608484	HMDB00788	C01103
M241T131	Thymidine	C10H14N2O5	242.09	Nucleosides, Nucleotides, and Analogues	241.084	nd	2.18	nd	a,b,d	1	stable	0.480913	HMDB00273	C00214
M137T73	Hypoxanthine	C5H4N4O	136.038	Nucleosides, Nucleotides, and Analogues	135.031	137.045	5.01	1.22	a,c,e	1	stable	0.390422	HMDB00157	C00262
M282T363	Guanosine	C10H13N5O5	283.092	Nucleosides, Nucleotides, and Analogues	282.085	284.098	6.11	1.09	a,b,c,d,e	1	stable	0.371911	HMDB00133	C00387
M110T198_1	Cytosine	C4H5N3O	111.043	Nucleosides, Nucleotides, and Analogues	110.036	nd	3.31	nd	a,b,d	1	stable	0.303238	HMDB00630	C00380
M263T130_2	Phenylacetyl-L-glutamine	C13H16N2O4	264.111	Amino Acids, Peptides, and Analogues	263.104	nd	2.18	nd	a,b,d	1	stable	0.561803	HMDB06061	C04148
M165T173_2	7-Methylxanthine	C6H6N4O2	166.049	Nucleosides, Nucleotides, and Analogues	165.042	nd	2.95	nd	a,b,d	1	stable	0.637752	HMDB01991	C16353
M179T121	Theobromine	C7H8N4O2	180.065	Nucleosides, Nucleotides, and Analogues	179.058	181.071	2.02	2.25	a,b,c,d,e	1	stable	0.546691	HMDB02825	C07480
M195T300	Caffeine	C8H10N4O2	194.08	Nucleosides, Nucleotides, and Analogues	nd	195.087	nd	5	a,c,e	1	stable	0.53109	HMDB01847	C07481
M150T106	Acetaminophen-(4-Acetamidophenol)	C8H9NO2	151.063	Aromatic Homomonocyclic Compounds	150.056	152.07	1.76	2.59	a,b,c,d,e	1	stable	0.00816748	HMDB01859	NA
M131T520	Ehtylmalonic acid	C5H8O4	132.042	Organic Acids and Derivatives	131.035	nd	8.66	nd	a,b,d	1	stable	1.39534	HMDB00622	NA
M334T471	Aspartylglycosamine (N-As)	C12H21N3O8	335.133	Carbohydrates and Carbohydrate Conjugates	334.126	nd	7.93	nd	a,b,d	1	stable	1.25718	HMDB00489	C04540
M218T192	Pantothenic acid	C9H17NO5	219.111	Alcohols and polyols	216.982	220.117	3.26	2.24	a,b,c,d,e	1	stable	1.23332	HMDB00210	C00864
M102T489	L-α-aminobutyric acid	C4H9NO2	103.063	Amino Acids, Peptides, and Analogues	102.056	nd	8.14	nd	a,b	1	stable	1.23231	HMDB00452	C02356
M503T512	Maltotriose	C18H32O16	504.169	Carbohydrates and Carbohydrate Conjugates	503.162	527.156	8.47	0.74	a,b,c,d	1	stable	1.22051	HMDB01262	C01835
M145T459	Adipic acid	C6H10O4	146.058	Organic Acids and Derivatives	145.051	nd	7.78	nd	a,b,d	1	stable	1.17883	HMDB00448	C06104
M148T221_2	S-ethyl-L-cysteine	C5H11NO2S	149.051	Amino Acids, Peptides, and Analogues	148.044	133.031	3.68	0.96	a,b,c,d	1	stable	1.1641	NA	NA
M121T124	Benzoic acid	C7H6O2	122.037	Aromatic Acids	121.03	nd	2.13	nd	a,b,d	1	stable	1.13083	HMDB01870	C00180
M250T456	Muramic acid	C9H17NO7	251.101	Carbohydrates and Carbohydrate Conjugates	250.094	252.107	7.63	0.76	a,b,c,d,e	1	stable	1.11509	HMDB03254	C06470
M241T78_2	Equol (phytoestrogen)	C15H14O3	242.094	Flavonoids	241.086	nd	1.3	nd	a,b	1	stable	1.10601	HMDB02209	C14131
M381T73_2	Medroxyprogesterone	C22H32O3	344.235	Steroids and steroid derivatives	343.228	nd	1.24	nd	a,b,d	1	stable	1.04624	HMDB01939	C07119
M129T92	4-Methyl-2-oxovaleric acid	C6H10O3	130.063	Fatty acids and conjugates	129.056	nd	1.58	nd	a,b,d	1	stable	1.02445	HMDB00695	C00233
M213T104	Val-Pro	C10H18N2O3	214.132	Amino Acids, Peptides, and Analogues	212.003	215.138	2.14	1.51	a,b,c,d,e	1	stable	0.997664	HMDB0029135	NA
M136T90	Salicylamide	C7H7NO2	137.048	Aminophenols	136.04	nd	1.54	nd	a,b,d	1	stable	0.989688	HMDB15687	NA
M227T93	Leu-Pro	C11H20N2O3	228.147	Amino Acids, Peptides, and Analogues	227.141	nd	1.62	nd	a,b,d	1	stable	0.982984	HMDB0011175	NA
M191T567_3	Isocitric-acid	C6H8O7	192.027	Organic Acids and Derivatives	191.02	215.016	9.91	0.94	a,b,c,d	1	stable	0.952838	HMDB00193	C00311
M99T155	Tiglic acid	C5H8O2	100.052	Fatty acids and conjugates	99.0452	nd	2.59	nd	a,b,d	1	stable	0.913055	HMDB01470	C08279
M213T129	d-Desthiobiotin	C10H18N2O3	214.132	Fatty acids and conjugates	213.125	nd	2.14	nd	a,b,d	1	stable	0.905984	HMDB03581	C01909
M133T516_2	Diglycolic acid	C4H6O5	134.022	Organic Acids and Derivatives	133.014	157.013	8.61	1.03	a,b,c,d	1	stable	0.88806	NA	NA
M133T516_1	Malic acid	C4H6O5	134.022	Organic Acids and Derivatives	133.014	nd	8.75	nd	a,b,d	1	stable	0.88806	HMDB00744	C00711
M195T158	1,7-Dimethyluric acid	C7H8N4O3	196.06	Nucleosides, Nucleotides, and Analogues	195.053	nd	2.71	nd	a,b,d	1	stable	0.885733	HMDB0011103	C16356
M142T184	Alpha-D-Aminoadipic acid	C6H11NO4	161.069	Amino Acids, Peptides, and Analogues	142.051	162.076	3.07	0.8	a,b,c,d,e	1	stable	0.878278	HMDB00510	C00956
M199T180	Eugenol (pdt cosmétique)	C10H12O2	164.084	Others	163.077	nd	1.42	nd	a,b,d	1	stable	0.867826	HMDB05809	C10453
M161T480_2	3-Hydroxy-3-methylglutaric acid	C6H10O5	162.053	Fatty acids and conjugates	161.046	145.049	9.01	1.24	a,b,c,d	1	stable	0.831633	HMDB00355	C03761
M161T480_1	Amylose	C6H10O5	162.053	Carbohydrates and Carbohydrate Conjugates	204.067	nd	8.51	nd	a,b,d	1	stable	0.831633	HMDB03403	C00718
M182T93	4-Pyridoxic acid	C8H9NO4	183.053	Nucleosides, Nucleotides, and Analogues	182.046	184.06	1.61	1.26	a,b,c,d,e	1	stable	0.824295	HMDB00017	C00847
M365T71	Nervonic acid	C24H46O2	366.35	Fatty acids and conjugates	365.343	nd	1.18	nd	a,b	1	stable	0.822952	HMDB02368	C08323
M303T534	N-Acetyl-Asp-Glu	C11H16N2O8	304.091	Amino Acids, Peptides, and Analogues	303.084	305.097	9.11	1.07	a,b,c,d,e	1	stable	0.818539	NA	NA
M147T480_2	D-2-Hydroxyglutaric acid	C5H8O5	148.037	Organic Acids and Derivatives	147.03	nd	8.33	nd	a,b,d	1	stable	0.810065	HMDB00606	C01087
M193T283	Imidazolelactic acid	C6H8N2O3	156.054	Amino Acids, Peptides, and Analogues	155.047	nd	5.16	nd	a,b,d	1	stable	0.802257	HMDB02320	C05132
M191T402_2	D-(-)-Quinic acid	C7H12O6	192.063	Polyols	191.056	nd	7.47	nd	a,b,d	1	stable	0.79374	HMDB03072	C06746
M189T128	Kynurenic acid	C10H7NO3	189.043	Amino Acids, Peptides, and Analogues	188.036	nd	2.15	nd	a,b,d	1	stable	0.780301	HMDB00715	C01717
M173T452	Shikimic acid	C7H10O5	174.053	Polyols	173.046	nd	7.53	nd	a,b,d	1	stable	0.771316	HMDB03070	C00493
M167T293	4-Hydroxymandelic acid	C8H8O4	168.042	Aromatic Acids	167.035	nd	4.89	nd	a,b,d	1	stable	0.763043	HMDB00822	C11527
M146T552	L-Glutamic acid	C5H9NO4	147.053	Amino Acids, Peptides, and Analogues	146.046	nd	10.62	nd	a,b,d	1	stable	0.756728	HMDB00148	C00025
M149T560	2,2'-Thiodiacetic acid	C4H6O4S	149.998	Organic Acids and Derivatives	148.992	nd	9.33	nd	a,b,d	1	stable	0.751002	HMDB42032	C14872
M119T70	L-Threonic-acid-1,4-lactone	C4H6O4	118.027	Lactones	nd	119.034	nd	1.17	a,c,e	1	stable	0.748018	HMDB00940	NA
M301T74_1	2-cis,4-trans-Abscisic acid	C15H20O4	264.136	Lipids	263.131	nd	1.38	nd	a,b,d	1	stable	0.741946	HMDB35140	C06082
M189T160	Glycyl-L-leucine	C8H16N2O3	188.116	Amino Acids, Peptides, and Analogues	nd	189.123	nd	2.65	a,c,e	1	stable	0.72834	HMDB00759	C02155
M368T75	Dehydroisoandrosterone 3-sulfate	C19H28O5S	368.166	Steroids and steroid derivatives	367.159	nd	1.25	nd	a,b,d	1	stable	0.71743	HMDB01032	C04555
M115T514_2	Maleic-acid	C4H4O4	116.011	Organic Acids and Derivatives	115.004	117.018	8.72	1.08	a,b,c,d,e	1	stable	0.711015	HMDB00176	C01384
M115T514_1	Fumaric acid	C4H4O4	116.011	Organic Acids and Derivatives	115.004	nd	8.72	nd	a,b,d	1	stable	0.711015	HMDB00134	C00122
M174T186	Indoleacetic acid	C10H9NO2	175.063	Indoles and Indole Derivatives	174.056	nd	3.2	nd	a,b,d	1	stable	0.697578	HMDB00197	C00954
M145T614	α-Ketoglutaric acid	C5H6O5	146.022	Organic Acids and Derivatives	145.014	nd	8.81	nd	a,b,d	1	stable	0.677781	HMDB00208	C00026
M219T45	Gluconic acid	C6H12O7	196.058	Carbohydrates and Carbohydrate Conjugates	195.051	219.047	7.63	0.76	a,b,c,d	1	stable	0.673466	HMDB00625	C00257
M281T246	Aspartyl-Phenylalanine	C13H16N2O5	280.106	Amino Acids, Peptides, and Analogues	nd	281.112	nd	4.1	a,c,e	1	stable	0.672384	HMDB0000706	NA
M339T71	Behenic acid	C22H44O2	340.334	Fatty acids and conjugates	339.327	nd	1.2	nd	a,b,d	1	stable	0.644316	HMDB00944	C08281
M343T515	D-(+)-Cellobiose	C12H22O11	342.116	Carbohydrates and Carbohydrate Conjugates	343.125	nd	8.59	nd	a,b	1	stable	0.624133	HMDB00055	C06422
M183T454	3-Methylglutaric acid	C6H10O4	146.058	Fatty acids and conjugates	145.051	nd	7.65	nd	a,b,d	1	stable	0.609593	HMDB00752	NA
M447T90	beta-estradiol-17beta-glucuronide	C24H32O8	448.21	Steroids and steroid derivatives	447.206	nd	1.5	nd	a,b,d	1	stable	0.601121	HMDB10317	NA
M179T215	paraxanthine	C7H8N4O2	180.065	Nucleosides, Nucleotides, and Analogues	179.058	181.071	2.02	3.55	a,b,c,d,e	1	stable	0.557855	HMDB01860	C13747
M166T490_2	Quinolinic acid	C7H5NO4	167.022	Amino Acids, Peptides, and Analogues	166.015	nd	8.31	nd	a,b,d	1	stable	0.522077	HMDB00232	C03722
M180T62	(±)-Salsolinol	C10H13NO2	179.095	Catecholamines and Derivatives	nd	180.101	nd	1.02	a,c	1	stable	0.503335	HMDB42012	C09642
M114T61	5-Aminolevulinic acid	C5H9NO3	131.058	Amino Acids, Peptides, and Analogues	nd	114.055	nd	1.02	a,c	1	stable	0.492763	HMDB01149	C00430
M365T45_2	Melibiose	C12H22O11	342.116	Carbohydrates and Carbohydrate Conjugates	nd	365.104	nd	0.74	a,c	1	stable	0.492333	HMDB00048	C05402
M213T76	Tridecanoic acid	C13H26O2	214.193	Fatty acids and conjugates	213.125	nd	1.28	nd	a,b	1	stable	0.491975	HMDB00910	C17076
M491T87_2	Deoxycorticosterone-21-glucoside	C27H40O8	492.272	Steroids and steroid derivatives	491.265	493.277	1.45	7.61	a,b,c,d	1	stable	0.486551	NA	NA
M189T48	N6-Acetyl-L-lysine	C8H16N2O3	188.116	Amino Acids, Peptides, and Analogues	nd	189.123	nd	0.81	a,c,e	1	stable	0.486086	HMDB00206	C02727
M115T111	2-Oxovaleric acid	C5H8O3	116.047	Organic Acids and Derivatives	115.04	nd	1.85	nd	a,b,d	1	stable	0.474849	HMDB01865	C06255
M272T74	2-Hydroxyhexadecanoic acid (2-Hydroxypalmitic acid)	C16H32O3	272.235	Fatty acids and conjugates	271.228	nd	1.24	nd	a,b,d	1	stable	0.460838	HMDB31057	NA
M141T548	cis,cis-Muconic acid	C6H6O4	142.027	Fatty acids and conjugates	141.02	nd	9.14	nd	a,b,d	1	stable	0.456601	HMDB06331	C02480
M118T393	L-Homoserine	C4H9NO3	119.058	Amino Acids, Peptides, and Analogues	118.051	120.065	6.5	0.76	a,b,c,d,e	1	stable	0.440611	HMDB00719	C00263
M146T489_2	N-Methyl-D-aspartic acid (NMDA)	C5H9NO4	147.053	Amino Acids, Peptides, and Analogues	146.046	nd	8.24	nd	a,b,d	1	stable	0.437167	HMDB02393	C12269
M181T247_2	1-Methyluric acid	C5H10N2O3	146.069	Amino Acids, Peptides, and Analogues	181.037	nd	4.26	nd	a,b,d	1	stable	0.432972	HMDB03099	C16359
M132T538	L-Aspartic-acid	C4H7NO4	133.037	Amino Acids, Peptides, and Analogues	132.03	134.044	9.11	0.76	a,b,c,d,e	1	stable	0.428748	HMDB00191	C00049
M173T566_3	Dehydroascorbic acid	C6H6O6	174.016	Carbohydrates and Carbohydrate Conjugates	173.009	nd	10.66	nd	a,b,d	1	stable	0.423118	HMDB01264	C00425
M217T545	5-Sulfosalicylic acid	C7H6O6S	217.988	Aromatic acids	215.115	nd	9.04	nd	a,b,d	1	stable	0.394666	HMDB0011725	C16199
M341T555	Lactulose	C12H22O11	342.116	Carbohydrates and Carbohydrate Conjugates	341.109	nd	9.26	nd	a,b,d	1	stable	0.376421	HMDB00740	C07064
M129T566	Mesaconic acid	C5H6O4	130.027	Fatty acids and conjugates	129.019	nd	9.86	nd	a,b,d	1	stable	0.368189	HMDB00749	C01732
M197T227	DL-vanillomandelic acid	C9H10O5	198.053	Catecholamines and Derivatives	195.053	nd	3.94	nd	a,b,d	1	stable	0.367826	HMDB00291	C05584
M445T87	Estrone glucuronide	C24H30O8	446.194	Steroids and steroid derivatives	445.19	nd	1.49	nd	a,b,d	1	stable	0.359054	HMDB04483	C11133
M195T430	Galactonic acid	C6H12O7	196.058	Carbohydrates and Carbohydrate Conjugates	195.051	nd	7.63	nd	a,b,d	1	stable	0.358947	HMDB00565	C00880
M176T282	6-Hydroxypyridine-3-carboxylic acid (6-hydroxynicotinic acid)	C6H5NO3	139.027	Pyridine and derivatives	138.02	nd	6.17	nd	a,b,d	1	stable	0.351901	HMDB02658	C01020
M194T346	alpha-Hydroxyhippuric-acid	C9H9NO4	195.053	Benzoic acids	194.046	196.06	3.69	3.39	a,b,c,d,e	1	stable	0.310497	HMDB02404	NA
M124T54	Nicotinic acid	C6H5NO2	123.032	Pyridine and derivatives	nd	124.039	nd	0.93	a,c,e	1	stable	0.282713	HMDB01488	C00253
M179T362_2	Hexose	C6H12O6	180.063	Carbohydrates and Carbohydrate Conjugates	179.056	nd	8.47	nd	a,b,d	2	stable	0.278531	HMDB00122	C00031
M177T465	D-(+)-Gluconic acid D-lactone (Gluconolactone)	C6H10O6	178.048	Carbohydrates and Carbohydrate Conjugates	177.041	nd	7.85	nd	a,b,d	2	stable	0.257446	HMDB00150	C00198
M179T216	Nicotinuric acid	C8H8N2O3	180.054	Amino Acids, Peptides, and Analogues	179.047	nd	3.6	nd	a,b,d	1	stable	0.253929	HMDB03269	C05380
M197T85	3,7-Dimethyluric acid	C7H8N4O3	196.06	Nucleosides, Nucleotides, and Analogues	nd	197.066	nd	1.41	a,c,e	1	stable	0.239059	HMDB01982	NA
M171T327	Gly-Pro	C7H12N2O3	172.085	Amino Acids, Peptides, and Analogues	171.078	173.091	6.17	0.84	a,b,c,d,e	1	stable	0.229118	HMDB00721	NA
M174T504	Guanidinosuccinic acid	C5H9N3O4	175.059	Amino Acids, Peptides, and Analogues	174.052	176.066	8.47	1.02	a,b,c,d,e	1	stable	0.220725	HMDB03157	C03139
M138T516	Hydroxynicotinic acid	C6H5NO3	139.027	Pyridine and derivatives	138.02	nd	8.8	nd	a,b,d	1	stable	0.220511	HMDB0002658	NA
M137T291	Nicotinamide N-oxide	C6H6N2O2	138.043	Pyridine and derivatives	137.036	nd	2.5	nd	a,b,d	1	stable	0.219696	HMDB02730	NA
M197T122	1,3-Dimethyluric acid	C7H8N4O3	196.06	Nucleosides, Nucleotides, and Analogues	nd	197.066	nd	2.04	a,c,e	1	stable	0.219439	HMDB01857	NA
M165T60	L-Rhamnose	C6H12O5	164.069	Carbohydrates and Carbohydrate Conjugates	nd	165.075	nd	0.77	a,c,e	2	stable	0.218823	HMDB00849	C00507
M157T98	2,5-Furandicarboxylic acid	C6H4O5	156.005	Furoic acids	154.999	157.013	9.91	1.64	a,b,c,d,e	1	stable	0.215275	HMDB04812	NA
M144T47	Stachydrine	C7H13NO2	143.095	Amino Acids, Peptides, and Analogues	nd	144.101	nd	0.79	a,c,e	1	stable	0.187927	HMDB04827	C10172
M162T45_2	Carnitine	C7H15NO3	161.105	Fatty acid esters	nd	162.112	nd	0.75	a,c,e	1	stable	0.179194	HMDB00062	C15025
M131T423	Asparagine	C4H8N2O3	132.054	Amino Acids, Peptides, and Analogues	131.046	nd	7.12	nd	a,b,d	1	stable	0.177783	HMDB00168	C00152
M305T414	7α-Hydroxytestosterone	C19H28O3	304.204	Steroids and steroid derivatives	nd	305.21	nd	6.91	a,c,e	1	stable	0.175157	HMDB03956	C05291
M198T205	Indole-3-carboxylic acid	C9H7NO2	161.048	Amino Acids, Peptides, and Analogues	160.041	nd	3.46	nd	a,b,d	1	stable	0.174944	HMDB03320	C19837
M260T93_2	Hydroxykynurenine	C10H12N2O4	224.08	Amino Acids, Peptides, and Analogues	179.083	nd	2.59	nd	a,b	1	stable	0.162558	HMDB00732	C02794
M326T339	Acetaminophen-glucuronide	C14H17NO8	327.095	Others	326.089	328.101	5.77	1.43	a,b,c,d,e	1	stable	0.138087	HMDB10316	NA
M265T247	4-Hydroxy-3-methoxyphenylglycol sulfate	C9H12O7S	264.03	Phenols	263.024	nd	3.44	nd	a,b,d	1	stable	0.105551	HMDB03332	NA
M252T426	D-(+)-Neopterin	C9H11N5O4	253.081	Pterins	252.073	254.087	7.98	0.8	a,b,c,d	1	stable	0.104183	HMDB00845	C05926
M168T222	Pyridoxine	C8H11NO3	169.074	Nucleosides, Nucleotides, and Analogues	168.067	nd	3.7	nd	a,b,d	1	stable	0.101397	HMDB00239	C00314
M103T517	Malonic acid	C3H4O4	104.011	Organic Acids and Derivatives	103.004	nd	8.73	nd	a,b,d	1	stable	0.0994574	HMDB00691	C00383
M118T51_4	5-Aminovaleric acid	C5H11NO2	117.079	Amino Acids, Peptides, and Analogues	nd	118.086	nd	0.85	a,c,e	1	stable	0.0920185	HMDB00883	C00183
M180T320_2	Tyrosine	C9H11NO3	181.074	Amino Acids, Peptides, and Analogues	180.067	182.081	5.37	1.06	a,b,c,d,e	1	stable	0.0881272	HMDB00158	C00082
M206T228	Xanthurenic-acid	C10H7NO4	205.037	Amino Acids, Peptides, and Analogues	203.083	206.044	7.66	3.81	a,b,c,d,e	1	stable	0.0879867	HMDB00881	C02470
M189T43	N6,N6,N6-Trimethyl-L-lysine	C9H20N2O2	188.153	Amino Acids, Peptides, and Analogues	nd	189.159	nd	0.71	a,c,e	1	stable	0.0793736	HMDB01325	C03793
M385T45	S-Adenosyl-homocysteine	C14H20N6O5S	384.122	Amino Acids, Peptides, and Analogues	nd	385.13	nd	0.75	a,c,e	1	stable	0.06242	HMDB00939	C00021
M127T330	Imidazoleacetic acid	C5H6N2O2	126.043	Amino Acids, Peptides, and Analogues	125.036	nd	5.66	nd	a,b,d	1	stable	0.0329483	HMDB02024	C02835
M465T69_1	Glycocholic acid	C26H43NO6	465.309	Bile acids	464.302	nd	1.48	nd	a,b,d	1	stable	0.0240298	HMDB00138	C01921
			a	Based on accurate mass
			b	Based on ZIC-pHILIC column retention time similarity with a standard
			c	Based on C18 column retention time similarity with a standard
			d	Based on MS² spectrum (ESI neg) similarity with a standard
			e	Based on MS² spectrum (ESI pos) similarity with a standard
			nd	not detected

## Sheet: Supplementary Table S3
Table S3. Assigned and non-assigned features most correlated to the sparse PLS regressions Comp[1] from C18-ESI+ or HILIC-ESI- datasets.
The first 20 features negatively or positively highly correlated among the 500 candidatess are displayed in the table through their correlation to Comp[1] they have or through the VIP value calculated from the sPLS regression. Complementary features a priori assigned in the list of 500 variables are incorporated in the table. NA: not assigned structurally.
Dataset	C18-ESI+				HILIC-ESI-
Rank	Features	Metabolites	VIP index	Correlations	Features	Metabolites	VIP index	Correlations
1	M286T311	NA	10.87	0.929	M291T964	NA	3.81	-0.904
2	M205T311_1	NA	10.75	0.927	M364T963	NA	6.53	-0.903
3	M204T311	NA	10.47	0.926	M151T962	NA	5.81	-0.899
4	M461T500	NA	11.10	0.906	M457T963	NA	3.79	-0.898
5	M226T318	NA	12.50	0.895	M585T963	NA	3.74	-0.898
6	M456T500	NA	9.64	0.887	M289T963	NA	3.13	-0.896
7	M385T500	NA	8.25	0.886	M373T963	NA	3.41	-0.896
8	M403T500	NA	8.03	0.878	M142T963	NA	5.52	-0.895
9	M231T403	NA	10.57	0.878	M189T962_3	NA	3.64	-0.894
10	M422T500	NA	8.05	0.877	M479T962_1	NA	3.58	-0.893
11	M421T500	NA	7.93	0.874	M384T963_1	NA	5.03	-0.893
12	M404T500	NA	7.67	0.872	M448T963	NA	6.28	-0.892
13	M386T500	NA	7.49	0.871	M163T962_3	NA	2.84	-0.892
14	M383T350	NA	8.09	0.870	M297T962_2	NA	3.68	-0.892
15	M218T374	NA	9.83	0.869	M751T963	NA	5.46	-0.891
16	M439T500	NA	7.32	0.866	M490T963	NA	5.08	-0.890
17	M433T346	NA	7.29	0.863	M163T962_1	NA	3.21	-0.890
18	M196T311	NA	9.26	0.862	M501T962	NA	3.74	-0.890
19	M453T523	NA	6.57	0.862	M295T962_1	NA	2.50	-0.890
20	M281T423	NA	10.41	0.862	M623T964	NA	5.02	-0.889
204	M189T160	glycyl-L-leucine	0.73	0.672
482	M173T47	D-Xylulose	0.96	-0.443
112					M229T519	D-ribose-5-phosphate	4.78	-0.869
251					M193T520_4	D-glucuronic acid	1.39	-0.818
264					M193T520_3	D-galacturonic acid	1.52	-0.808
292					M187T299	N-acetyl-L-glutamine	6.93	0.784
325					M209T542	D-saccharic acid	2.25	-0.742
379					M164T205	azelaic acid	7.43	0.650
383					M187T352	7-methylguanine	2.15	0.641
408					M300T72	acetyl-N-formyl-5-methoxykynurenamine-phenylacetyl-L-glutamine	0.94	0.599
411					M116T341	N-acetylglycine	4.71	0.596

## Sheet: Supplementary Table S4
Table S4. Summary of statistical modelling of the time-dependence variation of the metabolome distribution in C18-ESI+ and HILIC-ESI- datasets using polynomials on degrees 4 and 3, respectively, with x corresponding to the log-transformation of the time variable. Num: numerator, Den: denominator.
Datasets	C18-ESI+				HILIC-ESI-
Polynomials	Estimate	Std. Error	t value	Pr(>|t|)	Estimate	Std. Error	t value	Pr(>|t|)
Intercept	-0.685	2.943	-0.233	0.818	-23.193	4.170	-5.562	5.33 10-6
x	-30.096	16.721	-1.800	0.083	36.422	14.502	2.512	0.018
x2	65.408	29.623	2.208	0.036	-42.863	15.035	-2.851	0.008
x3	-51.569	20.545	-2.510	0.018	20.596	4.694	4.388	1.38 10-4
x4	14.510	4.892	2.966	0.006	-	-	-	-
Residual standard error	1.148				2.423
Degrees of Freedom (DF)	28				29
Multiple R2	0.92				0.96
Adjusted R2	0.91				0.95
F-statistics	DF Num	DF Den	F value		DF Num	DF Den	F value
	4	28	81.48	5.2 10-15	3	29	218.9	2.2 10-16

## Sheet: Supplementary Table S5
Table S5. List of external standards used for meconium analysis.
not detected
poor peak shape					RP-C18	ZICpHILIC
Compound	Elemental formula	Accurate Mass	ESI+	ESI-	Retention time	Retention time
					Rt (min)	Rt (min)
Alanine 13C	13C1 12C2 H7 N O2	90.051	91.0583		0.88
Metformin	C4 H11 N5	129.101	130.109		0.83
Ethylmalonic acid	C5 H8 O4	132.042		131.035		7.65
Aspartate 15N	C4 H7 15N1 O4	134.035	135.042	133.027	0.81	8.08
Glucose 13C	13C1 12C5 H12 O6	181.067	204.05596 (+Na)	216.03614 (+HCl)	0.85	7.2
2-Aminoanthracene	C14 H11 N	193.089	194.096		8.05
Amiloride	C6 H8 Cl N7 O	229.048	230.055	228.04061 and 264.01729 (+HCl)	3.1	6.7
Imipramine	C19 H24 N2	280.194	281.201		7.5
Atropine	C17 H23 N O3	289.168	290.175		5.2
Prednisone	C21 H26 O5	358.178	359.185	403.17482 (+HCOOH) and 393.14742 (+HCl)	6.75 and 7.00	1.95
Colchicine	C22 H25 N O6	399.168	400.175		6.44
Dihydrostreptomycin	C21 H41 N7 O12	583.281	584.2886 et 292.64794	618.25072 (+HCl)	0.72
Roxithromycin (fragment)	C29 H54 O10 N2	590.378	591.385	625.34725 (+HCl)	5.87 and 6.08	1.8
